# Supplementary material
Source: PubMed Central journal article supplement (PMC5951790)

## Online Only Supplemental Material

## **Supplemental Table S1. Eligibility and Exclusion Criteria**

### **Eligibility Criteria**

- 1) Clinical diagnosis of type 1 diabetes and using daily insulin therapy for at least one year and an insulin infusion pump for at least 6 months

*(The diagnosis of type 1 diabetes is based on the investigator's judgment; C peptide level and antibody determinations were not required)*

- 2) Age 6.0 to <15.0 years
- 3) Glycated hemoglobin level <10.0% (86 mmol/mol)
  - Measured with DCA2000 or equivalent device for assessing eligibility
  - Glycated hemoglobin measurements performed as part of usual clinical care within 2 weeks prior to obtaining informed consent for participation in the trial may be used.
- 4) Uninterrupted internet access while study system in use overnight and for uploading of study data the following morning
- 5) Living with a significant other or family member ("companion") committed to participating in all study activities, and being present and available to provide assistance when the system is in use at night
- 6) An understanding of and willingness to follow the protocol and sign the informed consent

### **Exclusion Criteria**

- 1) Diabetic ketoacidosis in the past 6 months
- 2) Hypoglycemic seizure or loss of consciousness in the past 6 months
- 3) History of seizure disorder (except for hypoglycemic seizure)
- 4) History of any heart disease including coronary artery disease, heart failure, or arrhythmias
- 5) Cystic fibrosis

- 6) Current use of oral/inhaled glucocorticoids, beta-blockers or other medications, which in the judgment of the investigator would be a contraindication to participation in the study.
- 7) History of ongoing renal disease (other than microalbuminuria). Creatinine level to have been obtained within the last year if participant has diabetes of >10 years duration. If creatinine is >1.5 mg/dL (132  $\mu$ mol/L), the participant is excluded.
- 8) Medical or psychiatric condition that in the judgment of the investigator might interfere with the completion of the protocol such as:
  - Inpatient psychiatric treatment in the past 6 months
  - Uncontrolled adrenal disorder
  - Abuse of alcohol
- 9) Pregnancy

*If female and sexually active, must agree to use a form of contraception to prevent pregnancy while a participant in the study. A negative serum pregnancy test will be required for all premenopausal women who are not surgically sterile. Participants who become pregnant will be discontinued from the study.*
- 10) Liver disease as defined by an ALT greater than 3 times the upper limit of normal

**Supplemental Table S2. Participant Characteristics at Enrollment (N=28 Participants) –**

*medians (IQR) or n (%)*

| Characteristic                       |                   |
|--------------------------------------|-------------------|
| Age (yrs)                            | 12 (10, 13)       |
| Range                                | 6 to 14           |
| Tanner Stage                         |                   |
| I                                    | 10 (36%)          |
| II                                   | 8 (29%)           |
| III                                  | 4 (14%)           |
| IV                                   | 2 (7%)            |
| V                                    | 4 (14%)           |
| Male                                 | 13 (46%)          |
| Race                                 |                   |
| White non-Hispanic                   | 22 (79%)          |
| Hispanic                             | 2 (7%)            |
| Pacific Islander                     | 1 (4%)            |
| Asian                                | 1 (4%)            |
| Black                                | 1 (4%)            |
| More than one                        | 1 (4%)            |
| Diabetes duration (yrs)              | 4 (3, 7)          |
| Range                                | 1 to 12           |
| Body-mass index (kg/m <sup>2</sup> ) | 17.8 (16.6, 19.8) |
| Daily insulin dose (U/kg/day)        | 0.83 (0.75, 0.94) |
| Enrollment HbA1c (%)                 | 7.6 (7.1, 8.6)    |
| (mmol/mol)                           | 60 (54, 70)       |
| Randomization HbA1c (%)              | 7.9 (7.2, 8.8)    |
| (mmol/mol)                           | 63 (55, 73)       |
| End of study HbA1c (%)               | 7.9 (7.3, 8.5)    |
| (mmol/mol)                           | 63 (56, 69)       |

**Supplemental Table S3. Distribution of Shutoff Duration, Pump Suspension, and Automatic Boluses per Night (Nights with  $\geq 4$  hrs CGM Data, N=28 Participants)**

|                                                                                          | PLGS Nights            | PHHM Nights             |
|------------------------------------------------------------------------------------------|------------------------|-------------------------|
| # Randomized Nights                                                                      | 600                    | 602                     |
| Nights with Pump Suspension [ <i>n</i> (%)]                                              | 431 (72%)              | 475 (79%)               |
| Glucose At First Shutoff*<br>[ <i>median (IQR)</i> ]                                     | N=427<br>117 (97, 146) | N=472<br>116 (98, 140)  |
| Total Duration of Pump Suspension (min)<br>[ <i>median (IQR)</i> ]                       | 70 (35, 111)           | 70 (35, 125)            |
| Nights with at least 120 Minutes Suspension during any 150 Minute window [ <i>n</i> (%)] | 33 (8%)                | 40 (8%)                 |
| Nights with a Cumulative 180 Minutes or more Suspension [ <i>n</i> (%)]                  | 22 (5%)                | 37 (8%)                 |
| Nights with Automatic Boluses [ <i>n</i> (%)]                                            | NA                     | 500 (83%)               |
| Glucose At First Automatic Bolus**<br>[ <i>median (IQR)</i> ]                            | NA                     | N=499<br>156 (137, 191) |
| Cumulative Amount of Boluses Per Night (units) <sup>†</sup><br>[ <i>median (IQR)</i> ]   | NA                     | 1.10 (0.45, 2.01)       |
| Nights with $\geq 4$ units of Automates Insulin Boluses <sup>†</sup> [ <i>n</i> (%)]     | NA                     | 24 (4.8%)               |
| Nights with Both Pump Suspension and Automatic Boluses [ <i>n</i> (%)]                   | NA                     | 395 (66%)               |
| Cumulative Time Pump was Suspended (min) ‡<br>[ <i>median (IQR)</i> ]                    | NA                     | 65 (35, 115)            |
| Cumulative Amount of Boluses Per Night (units) <sup>†</sup><br>[ <i>median (IQR)</i> ]   | NA                     | 0.95 (0.40, 1.93)       |

\* Glucose data at first shutoff missing for 4 PGLS and 3 PHHM nights.

\*\* Glucose data at first automatic bolus missing for one PHHM night.

† Among nights with automatic boluses only.

‡ Among nights with both pump suspension and automatic boluses.

**Supplemental Table S4. Night-Level Secondary Insulin Outcomes (Nights with  $\geq 4$  hrs CGM Data, N=28 Participants)**

|                                                                            | <b>PLGS<br/>Nights</b> | <b>PHHM<br/>Nights</b> | <b>P-Value</b> |
|----------------------------------------------------------------------------|------------------------|------------------------|----------------|
| # Randomized Nights with Complete Insulin Data                             | 600                    | 602                    | NA             |
| Total Basal Insulin Units [ <i>median (IQR)</i> ]                          | 5.71 (4.19, 8.67)      | 5.58 (4.22, 8.76)      | 0.74           |
|                                                                            |                        |                        |                |
| Nights with Automatic Boluses [ <i>n(%)</i> ]                              | NA                     | 500 (83%)              | NA             |
| Total Automatic Boluses Insulin Units <sup>†</sup> [ <i>median (IQR)</i> ] | NA                     | 1.10 (0.45, 2.01)      | NA             |
| Number of Automatic Boluses <sup>†</sup> [ <i>median (IQR)</i> ]           | NA                     | 19 (10, 29)            | NA             |
|                                                                            |                        |                        |                |
| Nights with Manual Boluses [ <i>n(%)</i> ]                                 | 251 (42%)              | 207 (34%)              | not done       |
| Total Manual Boluses Insulin Units <sup>‡</sup> [ <i>median (IQR)</i> ]    | 1.60 (0.90, 2.70)      | 1.10 (0.60, 2.25)      | not done       |
| Number of Manual Boluses <sup>‡</sup> [ <i>median (IQR)</i> ]              | 2 (1, 3)               | 1 (1, 2)               | not done       |
|                                                                            |                        |                        |                |
| Nights with Both Automatic and Manual Boluses [ <i>n(%)</i> ]              | NA                     | 179 (30%)              | NA             |
| Total Automatic Boluses Insulin Units <sup>*</sup> [ <i>median (IQR)</i> ] | NA                     | 1.35 (0.58, 2.05)      | NA             |
| Number of Automatic Boluses <sup>*</sup> [ <i>median (IQR)</i> ]           | NA                     | 20 (11, 30)            | NA             |
| Total Manual Boluses Insulin Units <sup>*</sup> [ <i>median (IQR)</i> ]    | NA                     | 1.10 (0.60, 2.20)      | NA             |
| Number of Manual Boluses <sup>*</sup> [ <i>median (IQR)</i> ]              | NA                     | 1 (1, 2)               | NA             |
| Total Basal and Boluses Insulin Units [ <i>median (IQR)</i> ]              | 6.50 (4.74, 9.44)      | 7.36 (5.23, 10.90)     | <0.001         |

† Among nights with automatic boluses only.

‡ Among nights with manual boluses only.

• Among nights with both automatic and manual boluses only.

**Supplemental Table S5. Additional Efficacy and Safety Night-Level Secondary Outcomes\***

**(N=28 Participants)**

|                                                                           | <b>PLGS<br/>Nights</b> | <b>PHHM<br/>Nights</b> | <b>P-value</b> |
|---------------------------------------------------------------------------|------------------------|------------------------|----------------|
| # Randomized Nights                                                       | 600                    | 602                    | NA             |
| Hours of Glucose Readings<br><i>median</i>                                | 9.3                    | 9.4                    | not done       |
| % Morning with blood glucose                                              |                        |                        | not done       |
| <60 mg/dL <i>n</i> (%)                                                    | 1 (<1%)                | 3 (<1%)                |                |
| 60-<70 mg/dL <i>n</i> (%)                                                 | 5 (<1%)                | 2 (<1%)                |                |
| 70 to 180 mg/dL <i>n</i> (%)                                              | 347 (58%)              | 466 (77%)              |                |
| >180-250 mg/dL <i>n</i> (%)                                               | 173 (29%)              | 93 (15%)               |                |
| >250 mg/dL <i>n</i> (%)                                                   | 74 (12%)               | 38 (6%)                |                |
| <b>Cumulative Sensor Metrics</b>                                          |                        |                        |                |
| % of nights with glucose level <50 mg/dL<br>for a cumulative duration of  |                        |                        |                |
| >5 min <i>n</i> (%)                                                       | 34 (5.7%)              | 41 (6.8%)              | 0.28           |
| >60 min <i>n</i> (%)                                                      | 4 (0.7%)               | 3 (0.5%)               | too few events |
| >120 min <i>n</i> (%)                                                     | 0 (0.0%)               | 0 (0.0%)               | too few events |
| >180 min <i>n</i> (%)                                                     | 0 (0.0%)               | 0 (0.0%)               | too few events |
| % of nights with glucose level <54 mg/dL<br>for a cumulative duration of  |                        |                        |                |
| >5 min <i>n</i> (%)                                                       | 47 (7.8%)              | 53 (8.8%)              | 0.46           |
| >60 min <i>n</i> (%)                                                      | 5 (0.8%)               | 7 (1.2%)               | too few events |
| >120 min <i>n</i> (%)                                                     | 2 (0.3%)               | 0 (0.0%)               | too few events |
| >180 min <i>n</i> (%)                                                     | 0 (0.0%)               | 0 (0.0%)               | too few events |
| % of nights with glucose level <60 mg/dL<br>for a cumulative duration of  |                        |                        |                |
| >5 min <i>n</i> (%)                                                       | 77 (13%)               | 81 (13%)               | 0.79           |
| >60 min <i>n</i> (%)                                                      | 14 (2.3%)              | 11 (1.8%)              | too few events |
| >120 min <i>n</i> (%)                                                     | 4 (0.7%)               | 1 (0.2%)               | too few events |
| >180 min <i>n</i> (%)                                                     | 1 (0.2%)               | 0 (0.0%)               | too few events |
| % of nights with glucose level <70 mg/dL<br>for a cumulative duration of  |                        |                        |                |
| >5 min <i>n</i> (%)                                                       | 137 (23%)              | 153 (25%)              | 0.46           |
| >60 min <i>n</i> (%)                                                      | 36 (6.0%)              | 39 (6.5%)              | 0.88           |
| >120 min <i>n</i> (%)                                                     | 9 (1.5%)               | 9 (1.5%)               | too few events |
| >180 min <i>n</i> (%)                                                     | 6 (1.0%)               | 3 (0.5%)               | too few events |
| % of nights with glucose level >180 mg/dL<br>for a cumulative duration of |                        |                        |                |
| >5 min <i>n</i> (%)                                                       | 453 (76%)              | 411 (68%)              | 0.02           |
| >60 min <i>n</i> (%)                                                      | 346 (58%)              | 306 (51%)              | 0.08           |
| >120 min <i>n</i> (%)                                                     | 285 (48%)              | 229 (38%)              | 0.003          |
| >180 min <i>n</i> (%)                                                     | 244 (41%)              | 172 (29%)              | <0.001         |
| % of nights with glucose level >250 mg/dL<br>for a cumulative duration of |                        |                        |                |
| >5 min <i>n</i> (%)                                                       | 182 (30%)              | 117 (19%)              | <0.001         |
| >60 min <i>n</i> (%)                                                      | 115 (19%)              | 56 (9.3%)              | <0.001         |
| >120 min <i>n</i> (%)                                                     | 89 (15%)               | 43 (7.1%)              | <0.001         |
| >180 min <i>n</i> (%)                                                     | 68 (11%)               | 23 (3.8%)              | <0.001         |
| % of nights with glucose level >300 mg/dL<br>for a cumulative duration of |                        |                        |                |
| >5 min <i>n</i> (%)                                                       | 54 (9.0%)              | 35 (5.8%)              | 0.03           |
| >60 min <i>n</i> (%)                                                      | 30 (5.0%)              | 18 (3.0%)              | 0.04           |

|                                                                           | <b>PLGS<br/>Nights</b> | <b>PHHM<br/>Nights</b> | <b>P-value</b> |
|---------------------------------------------------------------------------|------------------------|------------------------|----------------|
| >120 min <i>n</i> (%)                                                     | 22 (3.7%)              | 9 (1.5%)               | <0.001         |
| >180 min <i>n</i> (%)                                                     | 14 (2.3%)              | 5 (0.8%)               | 0.001          |
| <b>Consecutive Sensor Metrics</b>                                         |                        |                        |                |
| % of nights with glucose level <50 mg/dL consecutively for a duration of  |                        |                        |                |
| >10 min <i>n</i> (%)                                                      | 27 (4.5%)              | 34 (5.6%)              | 0.28           |
| >25 min <i>n</i> (%)                                                      | 9 (1.5%)               | 18 (3.0%)              | 0.01           |
| >30 min <i>n</i> (%)                                                      | 6 (1.0%)               | 14 (2.3%)              | too few events |
| >60 min <i>n</i> (%)                                                      | 1 (0.2%)               | 0 (0.0%)               | too few events |
| >120 min <i>n</i> (%)                                                     | 0 (0.0%)               | 0 (0.0%)               | too few events |
| % of nights with glucose level <54 mg/dL consecutively for a duration of  |                        |                        |                |
| >10 min <i>n</i> (%)                                                      | 33 (5.5%)              | 43 (7.1%)              | 0.19           |
| >25 min <i>n</i> (%)                                                      | 15 (2.5%)              | 25 (4.2%)              | 0.04           |
| >30 min <i>n</i> (%)                                                      | 10 (1.7%)              | 20 (3.3%)              | 0.01           |
| >60 min <i>n</i> (%)                                                      | 5 (0.8%)               | 4 (0.7%)               | too few events |
| >120 min <i>n</i> (%)                                                     | 1 (0.2%)               | 0 (0.0%)               | too few events |
| % of nights with glucose level <60 mg/dL consecutively for a duration of  |                        |                        |                |
| >10 min <i>n</i> (%)                                                      | 63 (11%)               | 71 (12%)               | 0.44           |
| >25 min <i>n</i> (%)                                                      | 38 (6.3%)              | 43 (7.1%)              | 0.55           |
| >30 min <i>n</i> (%)                                                      | 30 (5.0%)              | 35 (5.8%)              | 0.45           |
| >60 min <i>n</i> (%)                                                      | 8 (1.3%)               | 6 (1.0%)               | too few events |
| >120 min <i>n</i> (%)                                                     | 3 (0.5%)               | 1 (0.2%)               | 0.70           |
| % of nights with glucose level <70 mg/dL consecutively for a duration of  |                        |                        |                |
| >10 min <i>n</i> (%)                                                      | 126 (21%)              | 140 (23%)              | 0.52           |
| >25 min <i>n</i> (%)                                                      | 84 (14%)               | 89 (15%)               | 0.85           |
| >30 min <i>n</i> (%)                                                      | 73 (12%)               | 78 (13%)               | 0.75           |
| >60 min <i>n</i> (%)                                                      | 33 (5.5%)              | 32 (5.3%)              | too few events |
| >120 min <i>n</i> (%)                                                     | 7 (1.2%)               | 3 (0.5%)               | <0.001         |
| % of nights with glucose level >180 mg/dL consecutively for a duration of |                        |                        |                |
| >30 min <i>n</i> (%)                                                      | 388 (65%)              | 346 (57%)              | 0.07           |
| >60 min <i>n</i> (%)                                                      | 330 (55%)              | 290 (48%)              | 0.08           |
| >120 min <i>n</i> (%)                                                     | 258 (43%)              | 200 (33%)              | <0.001         |
| % of nights with glucose level >250 mg/dL consecutively for a duration of |                        |                        |                |
| >30 min <i>n</i> (%)                                                      | 135 (23%)              | 80 (13%)               | <0.001         |
| >60 min <i>n</i> (%)                                                      | 109 (18%)              | 52 (8.6%)              | <0.001         |
| >120 min <i>n</i> (%)                                                     | 77 (13%)               | 36 (6.0%)              | <0.001         |
| % of nights with glucose level >300 mg/dL consecutively for a duration of |                        |                        |                |
| >30 min <i>n</i> (%)                                                      | 38 (6.3%)              | 23 (3.8%)              | 0.04           |
| >60 min <i>n</i> (%)                                                      | 27 (4.5%)              | 15 (2.5%)              | 0.02           |
| >120 min <i>n</i> (%)                                                     | 17 (2.8%)              | 9 (1.5%)               | 0.02           |

\*Glucose results from CGM unless specified as blood glucose.



To convert glucose to mmol/L, multiply by 0.0555.



**Supplemental Table S6: System Performance Metrics (N=28 Participants)**

|                                                                                                                                                          | <b>PLGS<br/>Nights</b> | <b>PHHM<br/>Nights</b> | <b>All<br/>Nights</b> |
|----------------------------------------------------------------------------------------------------------------------------------------------------------|------------------------|------------------------|-----------------------|
| % Time CGM device functional while controller was active (i.e. readings available in post-hoc device download)                                           | 90%                    | 90%                    | 90%                   |
| % of available CGM readings obtained by controller                                                                                                       |                        |                        |                       |
| within 10 minutes of CGM reading                                                                                                                         | 94%                    | 94%                    | 94%                   |
| within 20 minutes of CGM reading                                                                                                                         | 99%                    | 98%                    | 98%                   |
| % Automatic Bolus Requests Successfully Delivered                                                                                                        | NA                     | 92%                    | NA                    |
| Nights with at least one Instance of Automated Monitoring Alerts <i>n</i> (%)                                                                            |                        |                        |                       |
| Low CGM                                                                                                                                                  | 44 (7%)                | 56 (9%)                | 100 (8%)              |
| High CGM                                                                                                                                                 | 0 (0%)                 | 0 (0%)                 | 0 (0%)                |
| Large Bolus                                                                                                                                              | 0 (0%)                 | 3 (<1%)                | 3 (<1%)               |
| Lost Communication                                                                                                                                       | 7 (1%)                 | 9 (1%)                 | 16 (1%)               |
| Missing CGM                                                                                                                                              | 0 (0%)                 | 0 (0%)                 | 0 (0%)                |
| Among PLGS nights with CGM $\geq$ 140 mg/dL, % algorithm would have recommended an Automatic Bolus within the prior 2 hr <i>n</i> (%)                    | 57 (81%)               | NA                     | NA                    |
| Among PLGS nights when algorithm would have recommended an Automatic Bolus, % with CGM $\geq$ 140 mg/dL within 2 hr of first recommendation <i>n</i> (%) | 452 (95%)              | NA                     | NA                    |

To convert glucose to mmol/L, multiply by 0.0555.

### Supplemental Figure S1. Study Flowchart

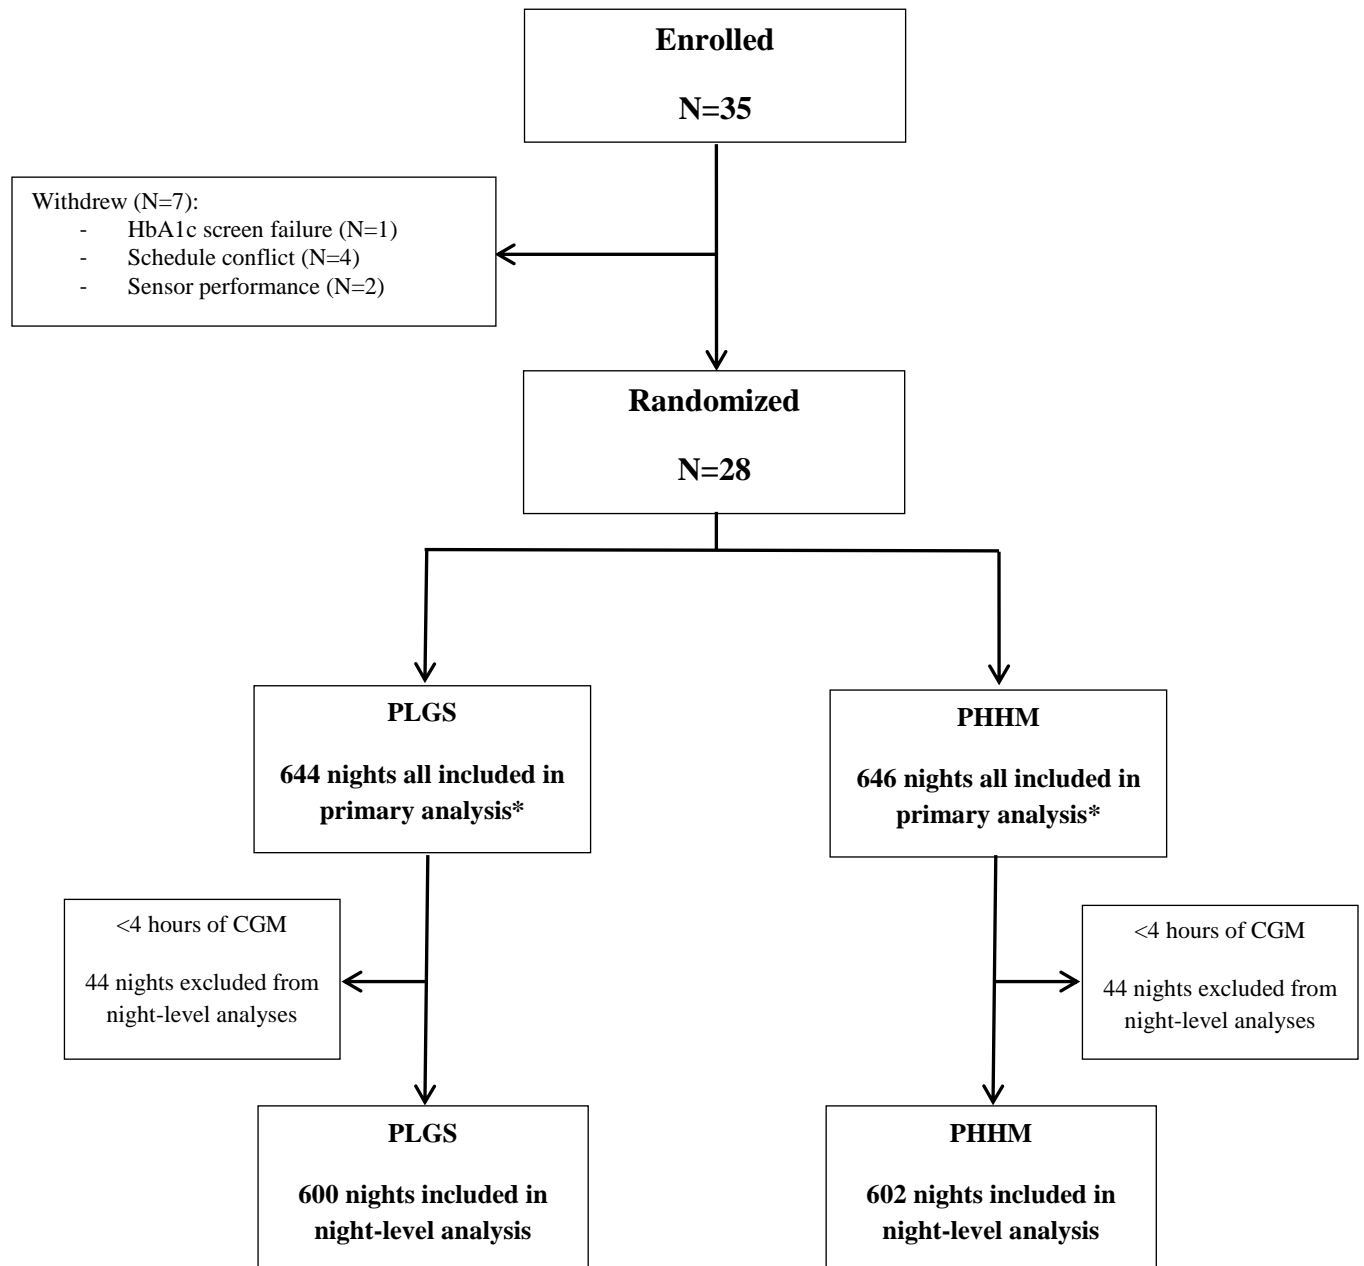

\* There were 11 (PLGS) and 15 (PHHM) randomized nights with no CGM data at all.

**Supplemental Figure S2. Representative session plot from a night that included both automated correction boluses and automated predictive low-glucose suspend**

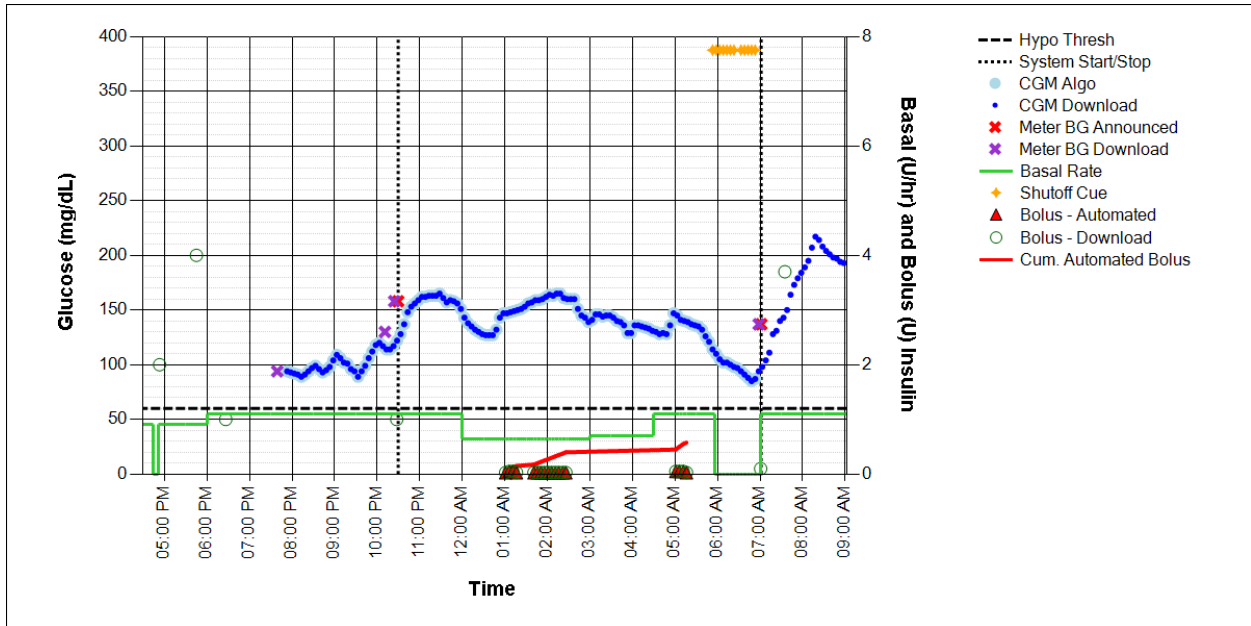

**Supplemental Figure S3. Percent Time Glucose in the Range 70 to 180 mg/dL by Treatment Arm (N=28 Participants).** The diagonal represents the line of identity.

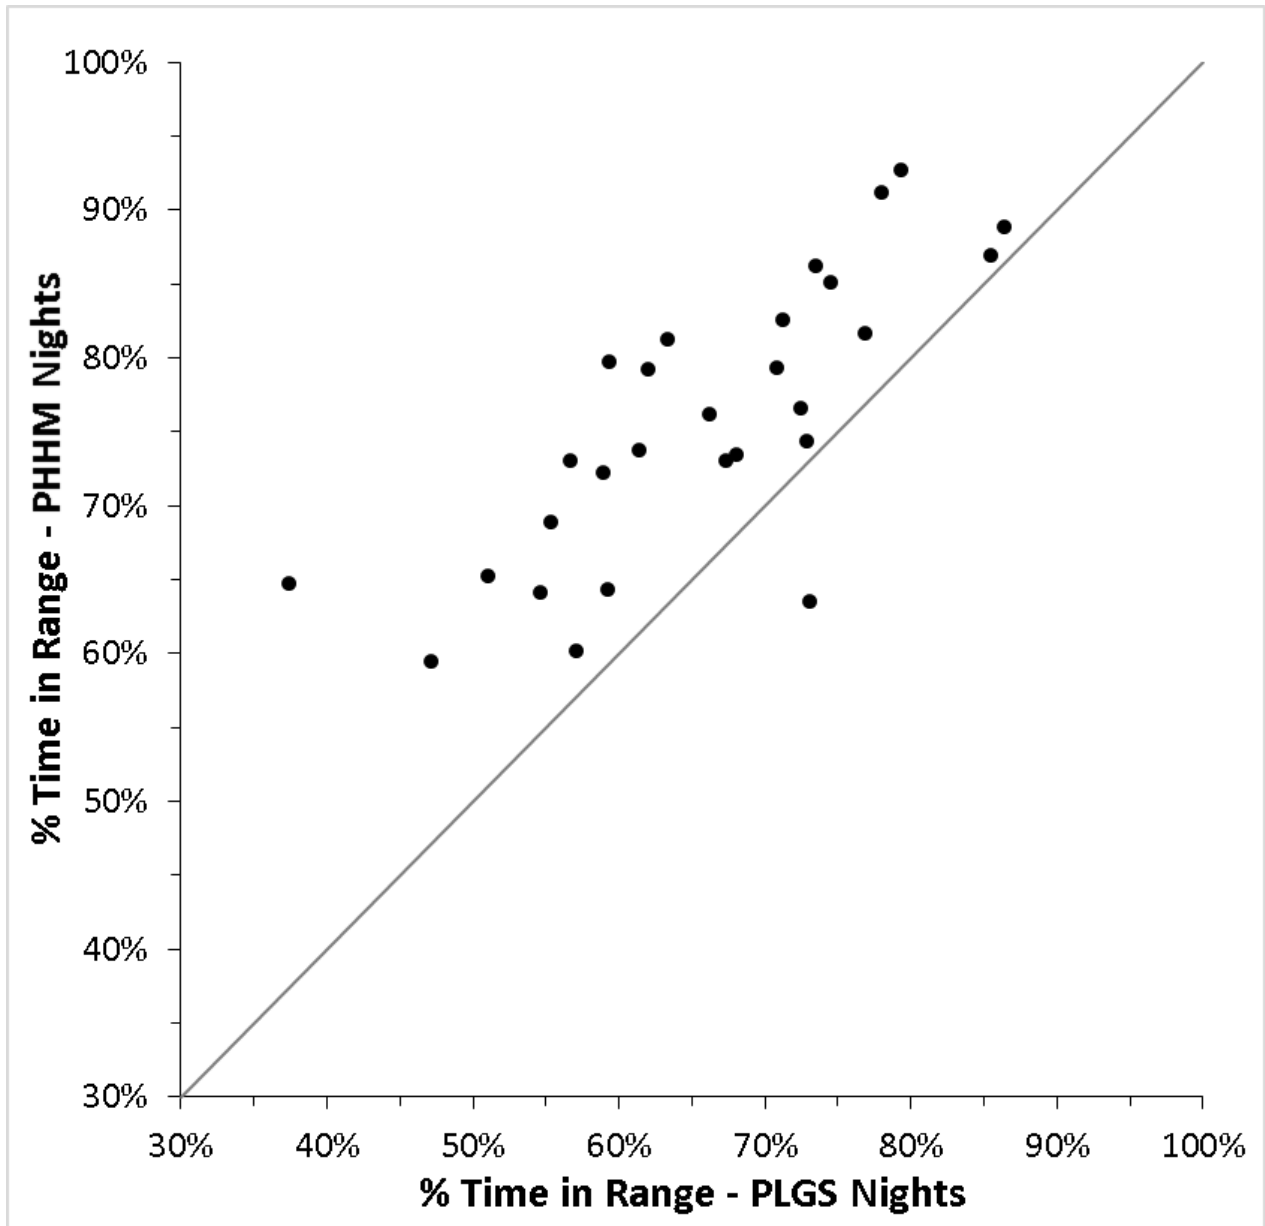

**Supplemental Figure S4. Percent Time Glucose in Range 70 to 180, Below 70, and Above 180 mg/dL (A), Mean Glucose (B), and Coefficient of Variation (C) after System Deactivation for the Two Treatment Arms (N=28 Participants)**

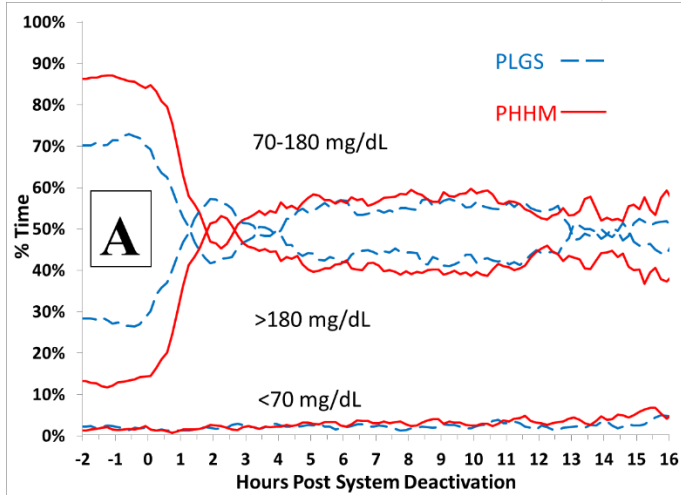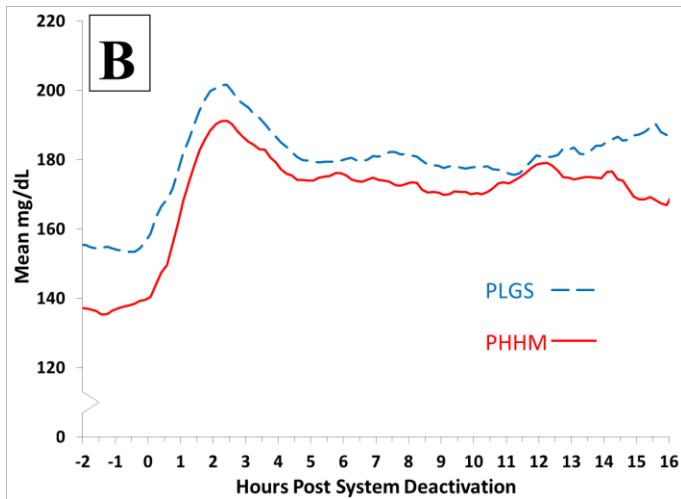

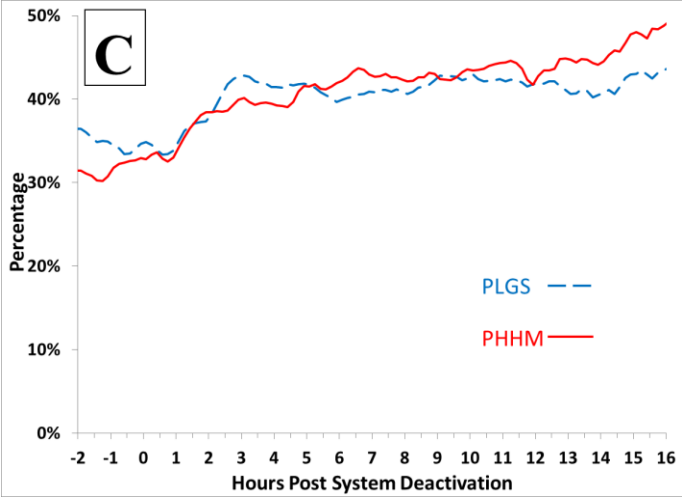

Supplement: NIHMS962241-supplement-Fig_S1-4_Table_S1-6.pdf [file NIHMS962241-supplement-Fig_S1-4_Table_S1-6.pdf]
