# Supplementary material
Source: PubMed Central journal article supplement (PMC5951790)
Supplement: NIHMS962241-supplement-supplement_1.pdf [file NIHMS962241-supplement-supplement_1.pdf]

## APPENDIX S1. IN HOME CLOSED LOOP STUDY GROUP

Clinical Centers: Listed with clinical center name, city, and state. Personnel are listed as (PI) for Principal Investigator, (I) for co-Investigator, (C) for Coordinators and (O) for Other Personnel: *Division of Pediatric Endocrinology and Diabetes, Stanford University, Stanford, CA*: Bruce Buckingham, M.D. (PI); Trang Ly, M.B.B.S., F.R.A.C.P., Ph.D. (I); Darrell M. Wilson, M.D. (I); Lisa Norlander, M.D. (I); Laya Ekhlaspour, M.D. (I); Hyojin Min, N.P (I); David M. Maahs, M.D., Ph.D. (I); Paula Clinton, R.D. (C); Eliana Frank (C); Tali Jacobson, (C); Liana Hsu (O); Sarah Loebner (O); *Barbara Davis Center for Childhood Diabetes, University of Colorado, Denver, CO*: H. Peter Chase, M.D. (PI); David M. Maahs, M.D., Ph.D. (I); Gregory Forlenza, M.D. (I); R. Paul Wadwa,

M.D. (I); Emily Jost, M.P.H., R.D., C.D.E., C.S.S.D. (C); Laurel Messer, M. P. H., R.N., C.D.E. (C); Emily Westfall, B.A., B.S. (O); Cari Berget, R.N., C.D.E. (O); Maninderpal Sethi, B.A. (O); S. Michelle Clay, R.N. (O); Lindsey Schulhof, B.A. (O); Samantha Lange, R.N. (O); Katie Thivener, B.A. (O); *Rensselaer Polytechnic Institute, Troy, NY*: B. Wayne Bequette, Ph.D. (PI); Faye Cameron, Ph.D. (I)

Coordinating Center: *Jaeb Center for Health Research, Tampa, FL*: Roy W. Beck, M.D., Ph.D. (PI); John Lum, M.S. (O); Craig Kollman, Ph.D.; Dan Raghinaru, M.S.; Nelly M. Njeru, C.C.R.P (C); Sydnee Bradshaw (O); Chris McCarthy (O); Carlos Murphy (O).

Data and Safety Monitoring Board: Irl Hirsch, M.D. (current Chair); Michael Tansey, M.D. (current Member); Carol Levy, M.D. (current Member); John C. Pickup, B.M., D.Phil. (past Chair); Howard Wolpert, M.D. (past Member)
